# Supplementary material for: Lacticaseibacillus paracasei PS23 increases ghrelin levels and modulates microbiota composition: a post-hoc analysis of a randomized controlled study
Source: Royal Society of Chemistry journal article supplement (doi:10.1039/d4fo01328j), 2024-01-01
Supplement: d4fo01328j1.pdf [file d4fo01328j1.pdf]

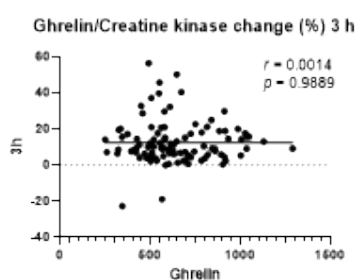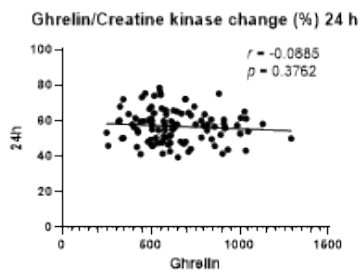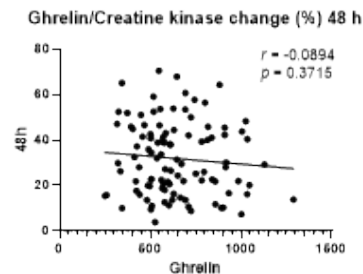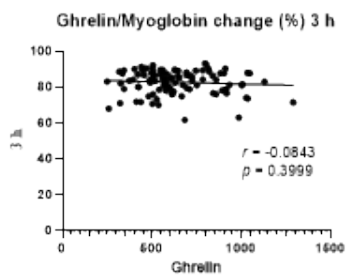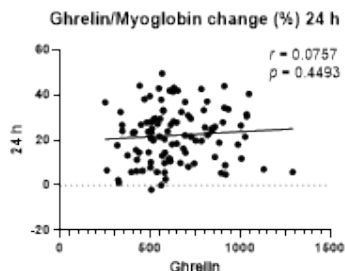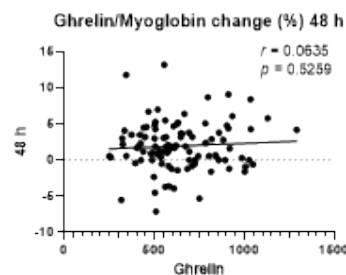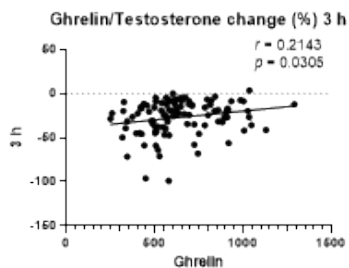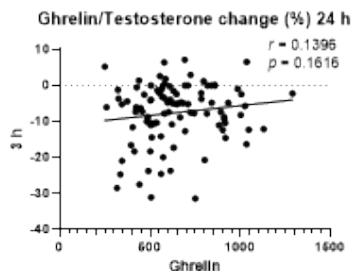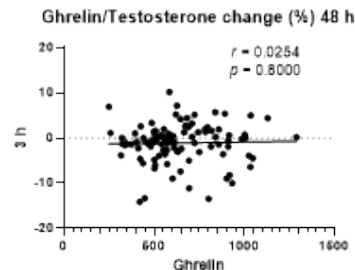

The correlation of ghrelin level and muscle damage and inflammation biomarkers

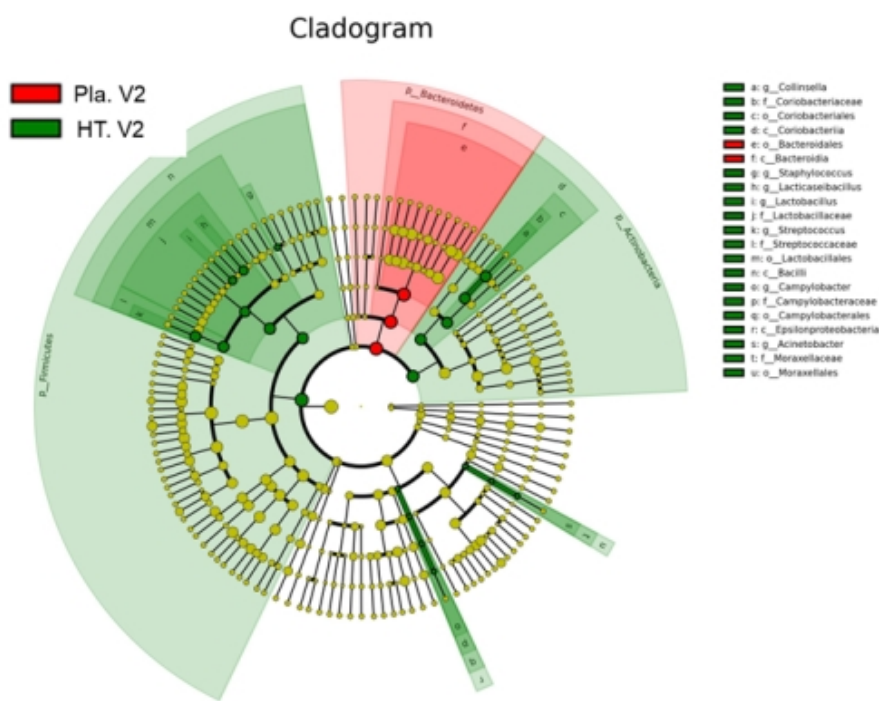

Linear discriminant analysis effect size (LEfSe) analysis of the gut microbiota among the placebo and HT-PS23 groups.

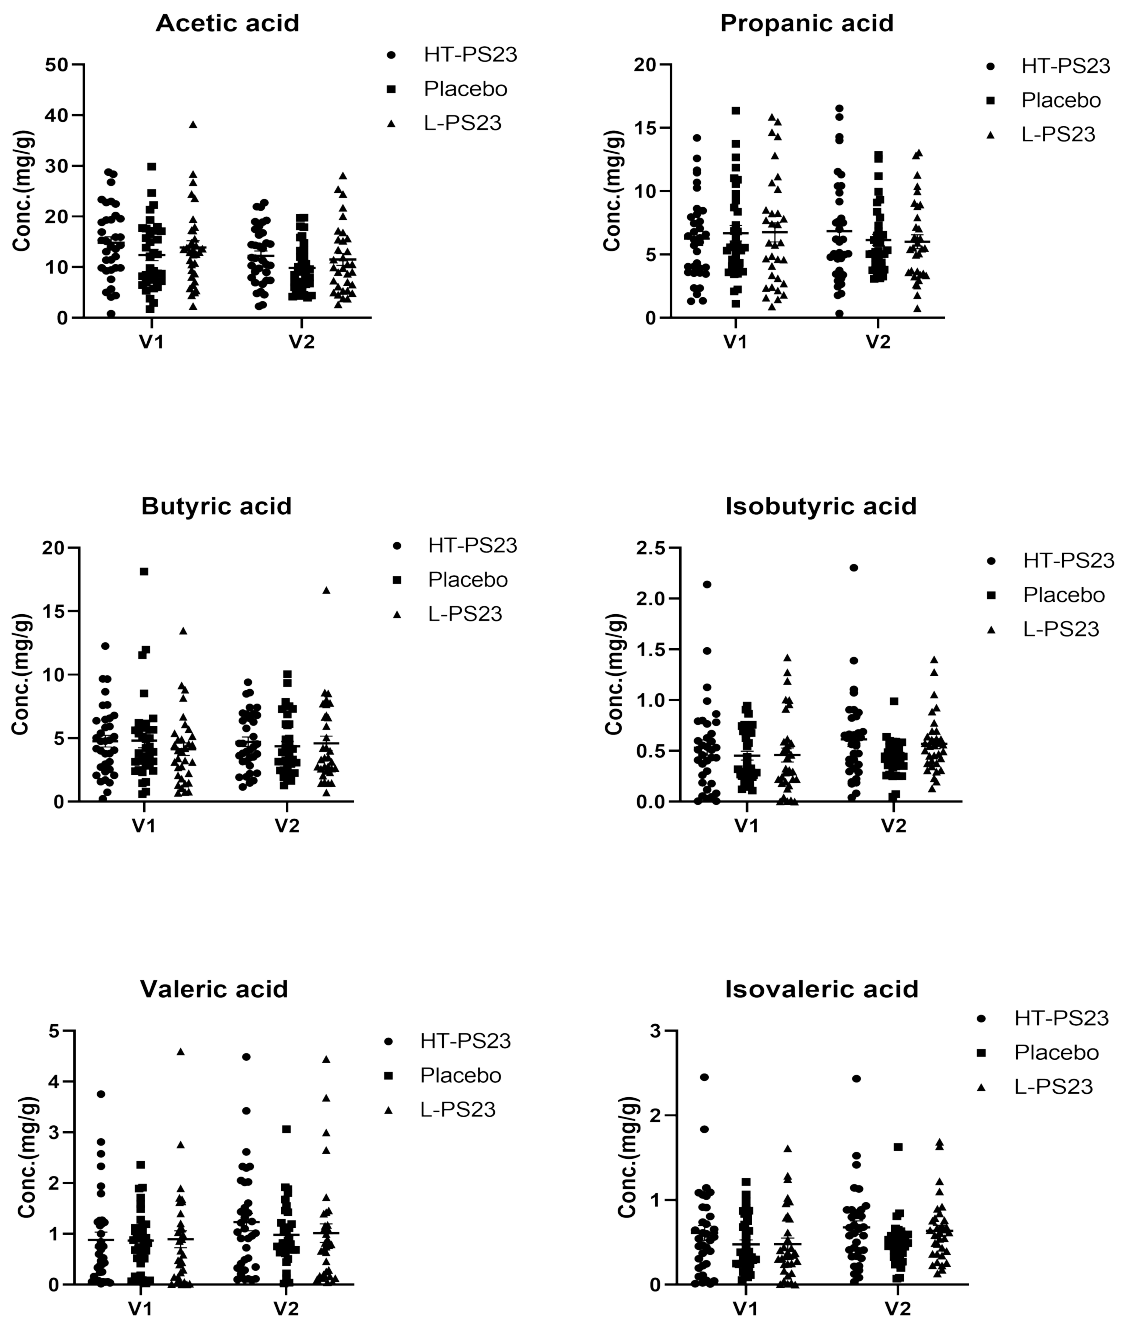

The effect of PS23 on fecal short-chain fatty acid (SCFA) concentrations
